# Supplementary material
Source: PubMed Central journal article supplement (PMC2830708)
Supplement: NIHMS100581-supplement-Supp.pdf [file NIHMS100581-supplement-Supp.pdf]

## Supplementary Figures

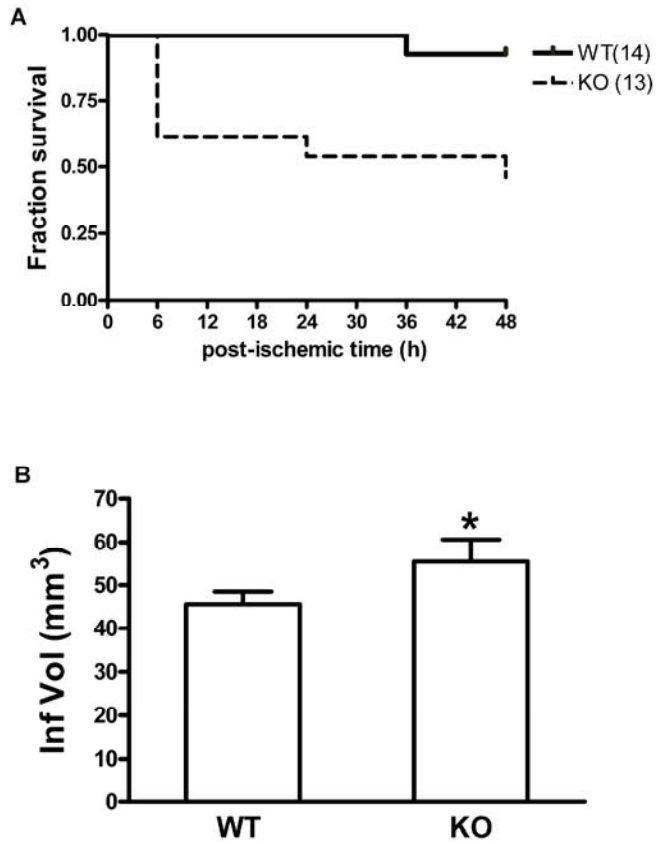

**Figure 1S.** High mortality (A) and enlarged infarct size (B) in hyperlipidemic mice. WT were fed ND and ApoE KO mice were fed HD for 8 weeks after wean. Infarct volume was measured 2 days after ischemia in survived mice (N=13 for WT, N=7 for KO). WT, wild type mice; KO, ApoE KO mice.

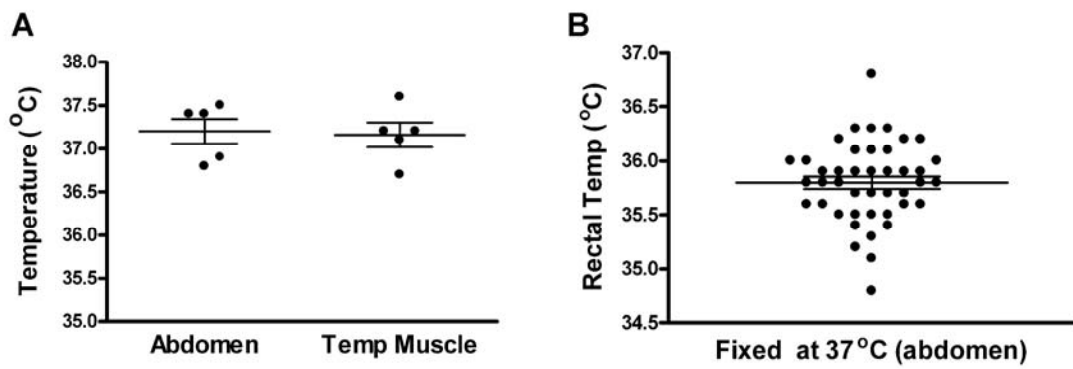

**Figure 2S.** Relationship among rectal, abdominal and brain temperature. **A**, Recordings of abdomen and temporal muscle in the head when a rectal temperature was fixed at 36.5°C as a set point. **B**, Recordings of rectal temperature when an abdomen temperature was fixed at 37°C as a set point.
